# Supplementary material
Source: publisher figshare collection journal article supplement (https://karger.figshare.com/articles/dataset/_/5127733)
Supplement: Supplementary file 2 [file 1]

**Supplementary Table 1.** Frequencies of *trans*-rearrangements with breakpoints in TCR in equids

| Species          | Frequency /10,000 cells |                 |                |       |
|------------------|-------------------------|-----------------|----------------|-------|
| Animal no.       | <i>TRAD;TRB</i>         | <i>TRAD;TRG</i> | <i>TRB;TRG</i> | Total |
| Horse            |                         |                 |                |       |
| 1                | 20.0                    | 10.0            | 8.0            | 38.0  |
| 2                | 16.0                    | 20.0            | 4.0            | 40.0  |
| 3                | 34.0                    | 4.0             | 18.0           | 56.0  |
| 4                | 14.0                    | 16.0            | 18.0           | 48.0  |
| 5                | 26.0                    | 8.0             | 6.0            | 40.0  |
| 6                | 24.0                    | 24.0            | 6.0            | 54.0  |
| 7                | 12.0                    | 18.0            | 14.0           | 44.0  |
| 8                | 20.0                    | 14.0            | 22.0           | 56.0  |
| 9                | 8.0                     | 6.0             | 6.0            | 20.0  |
| 10               | 24.0                    | 24.0            | 14.0           | 62.0  |
| Mean             | 19.8                    | 14.4            | 11.6           | 45.8  |
| Donkey           |                         |                 |                |       |
| 1                | 12.0                    | 42.0            | 10.0           | 64.0  |
| 2                | 18.0                    | 16.0            | 12.0           | 46.0  |
| 3                | 22.0                    | 18.0            | 6.0            | 46.0  |
| 4                | 28.0                    | 26.0            | 10.0           | 64.0  |
| 5                | 28.0                    | 10.0            | 6.0            | 44.0  |
| Mean             | 21.6                    | 22.4            | 8.8            | 52.8  |
| Burchell's zebra |                         |                 |                |       |
| 1                | 48.0                    | 24.0            | 38.0           | 110.0 |
| 2                | 68.0                    | 30.0            | 12.0           | 110.0 |
| 3                | 48.0                    | 2.0             | 4.0            | 54.0  |
| 4                | 54.0                    | 6.0             | 16.0           | 76.0  |
| 5                | 52.0                    | 36.0            | 26.0           | 114.0 |
| 6                | 48.0                    | 18.0            | 14.0           | 80.0  |
| Mean             | 53.0                    | 19.3            | 18.3           | 90.7  |
| Grevy's zebra    |                         |                 |                |       |
| 1                | 48.0                    | 24.0            | 24.0           | 96.0  |
| 2                | 34.0                    | 36.0            | 16.0           | 86.0  |
| 3                | 40.0                    | 20.0            | 10.0           | 70.0  |
| 4                | 22.0                    | 10.0            | 10.0           | 42.0  |
| 5                | 28.0                    | 22.0            | 14.0           | 64.0  |
| Mean             | 34.4                    | 22.4            | 14.8           | 71.6  |
| Hartmann's zebra |                         |                 |                |       |
| 1                | 2.0                     | 22.0            | 2.0            | 26.0  |
| 2                | 6.0                     | 28.0            | 0.0            | 34.0  |
| 3                | 6.0                     | 32.0            | 2.0            | 40.0  |
| 4*               | 0.0                     | 8.6             | 0.0            | 8.6   |
| Mean             | 3.8                     | 22.2            | 1.1            | 27.1  |

*TRAD* stands for *TRA/TRD*

\* 3,474 metaphase cells were examined in this animal (5,000 cells were examined in all other animals)
